# Supplementary material for: Baricitinib treatment resolves lower airway inflammation and neutrophil recruitment in SARS-CoV-2-infected rhesus macaques
Source: bioRxiv or medRxiv preprint supplement (doi:10.1101/2020.09.16.300277), 2020-09-16

**Figure S7**

**a Interferon Stimulated Genes**

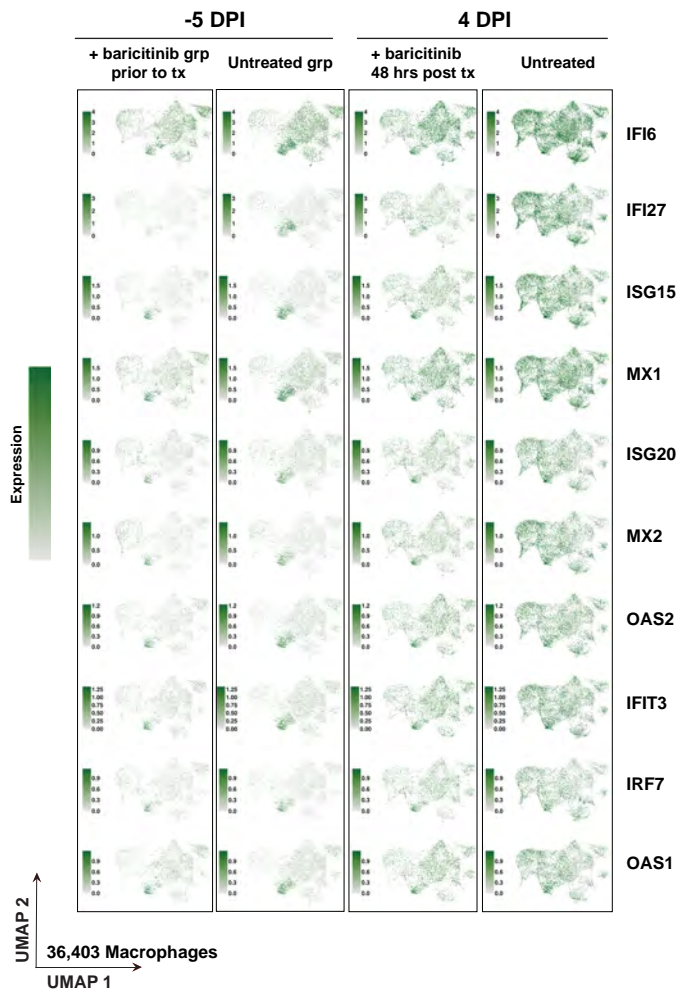

**b Heatmap showing expression of Chemokines, Inflammatory genes and ISGs**

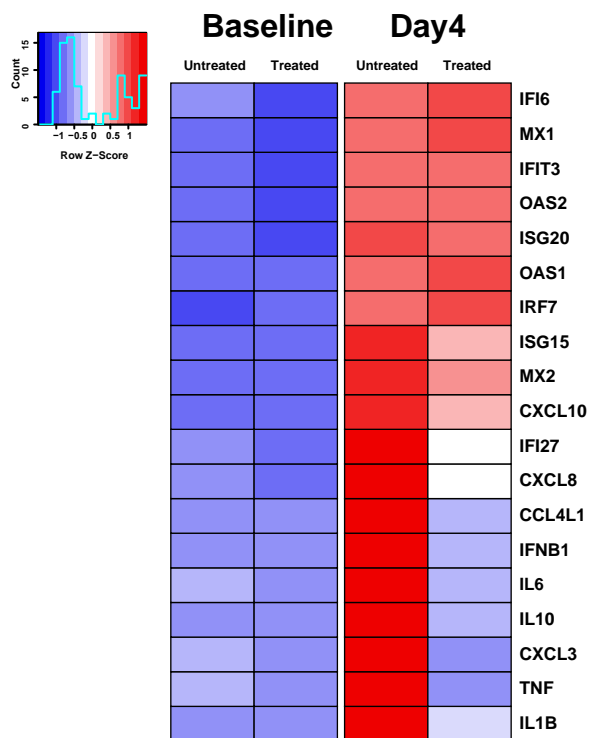

**C ISGs Dot Plot**

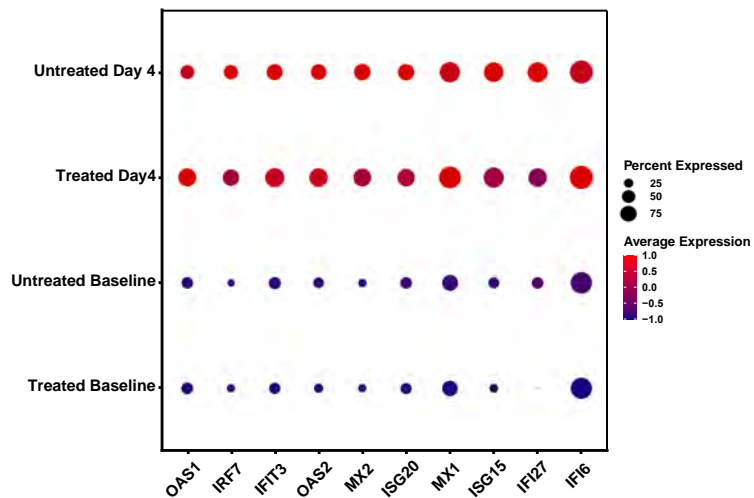

**d Inflammatory Genes Dot Plot**

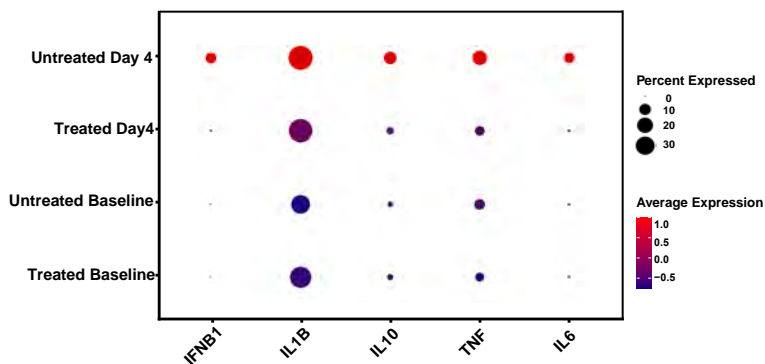

**e Chemokines Dot Plot**

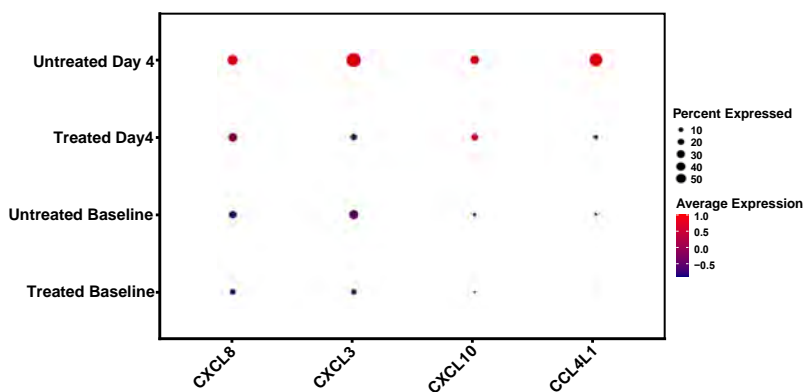

Supplement: Supplementary file [file media-7.pdf]
