# Supplementary material for: Baricitinib treatment resolves lower airway inflammation and neutrophil recruitment in SARS-CoV-2-infected rhesus macaques
Source: bioRxiv or medRxiv preprint supplement (doi:10.1101/2020.09.16.300277), 2020-09-16

Figure S8

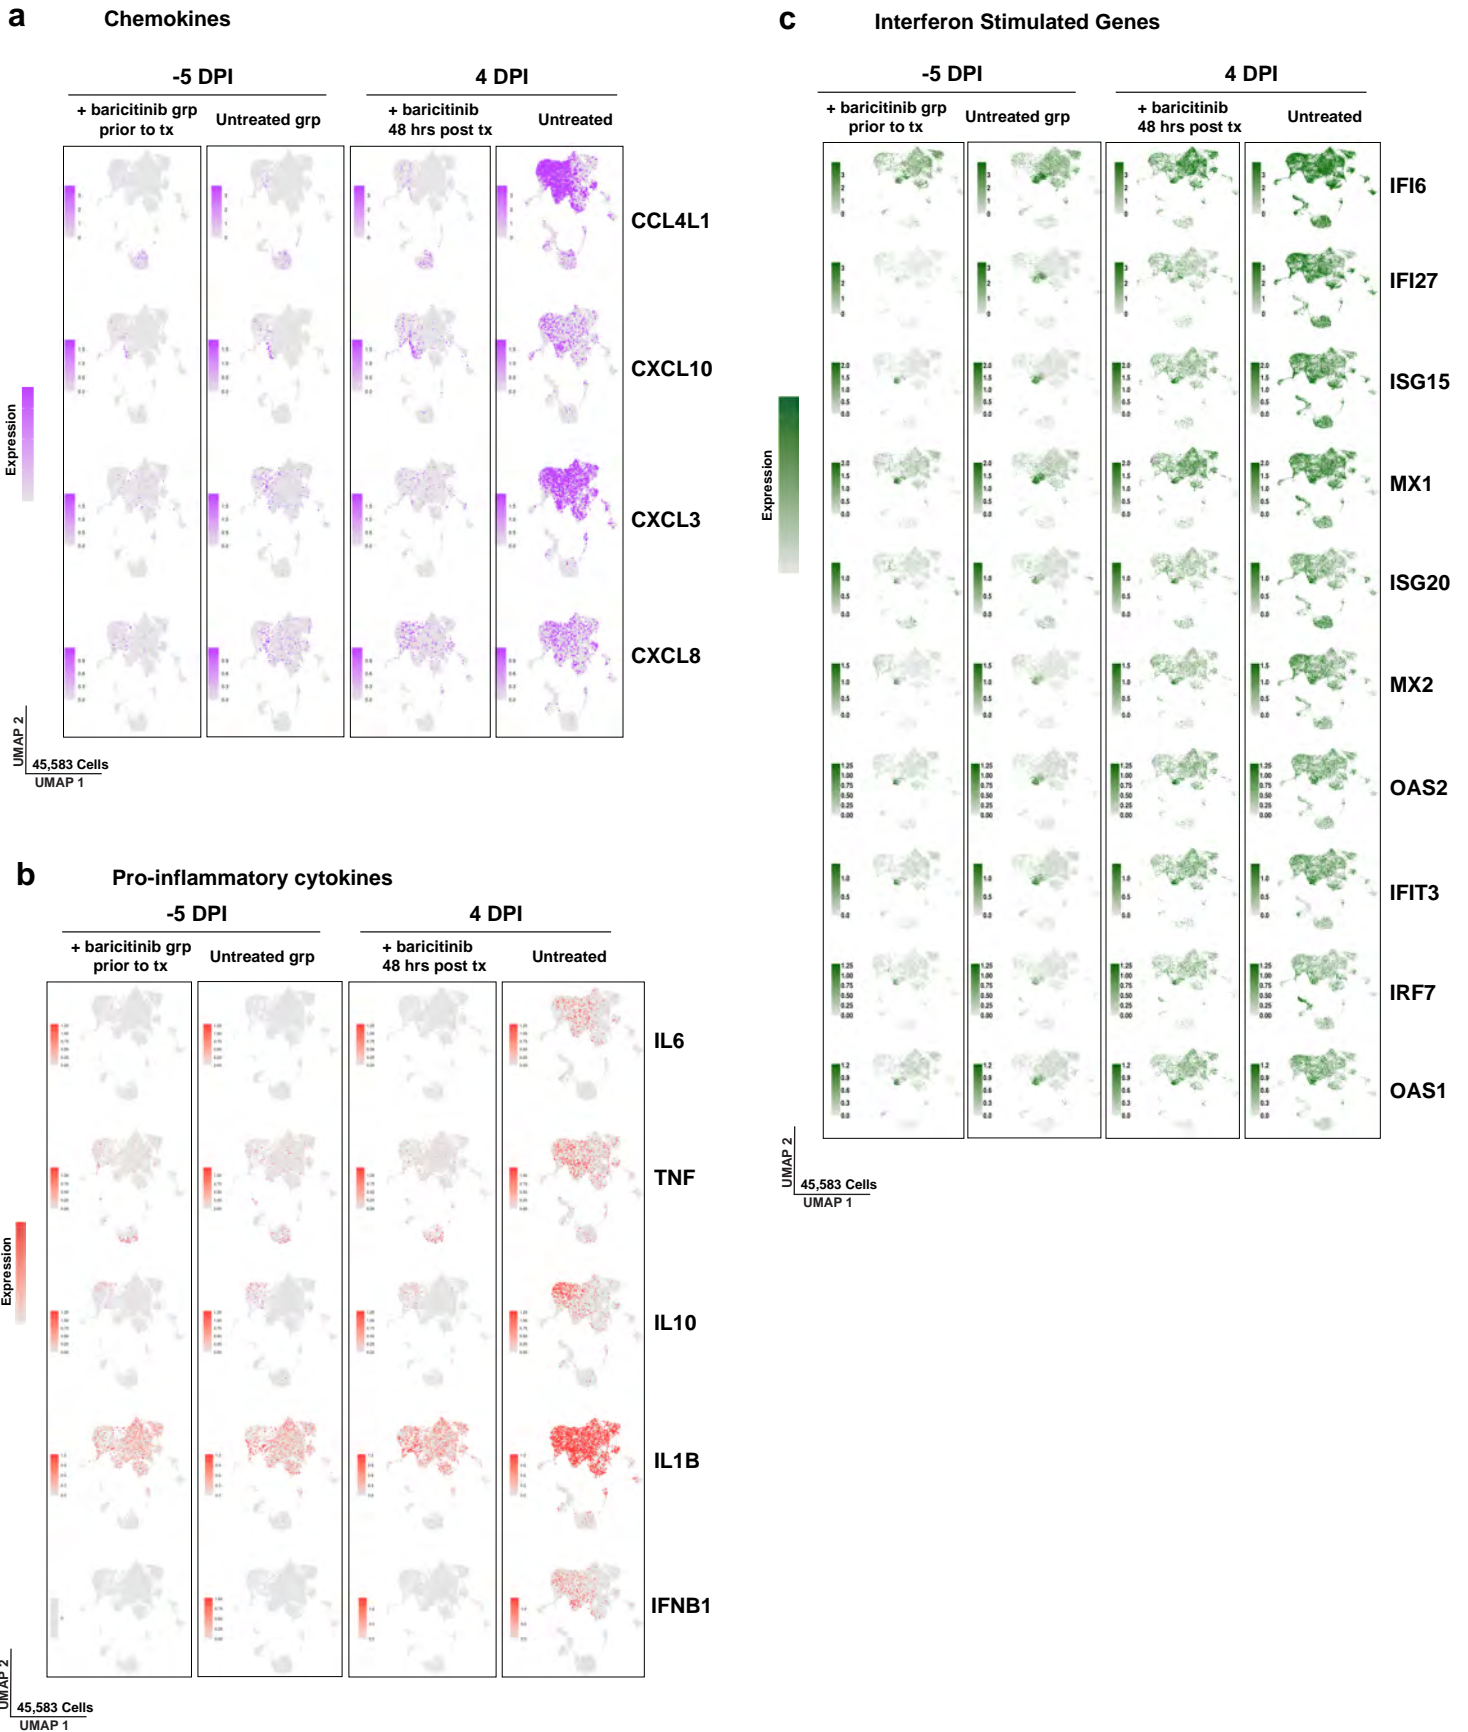

Supplement: Supplementary file [file media-8.pdf]
